# Modeling the dynamics of mouse iron body distribution: hepcidin is necessary but not sufficient

Jignesh H. Parmar<sup>1</sup>, Grey Davis<sup>1</sup>, Hope Shevchuk<sup>1</sup> and Pedro Mendes<sup>1,2,3,\*</sup>

<sup>1</sup> Center for Quantitative Medicine and Department of Cell Biology, UConn Health, Farmington, Connecticut, USA.

<sup>2</sup> School of Computer Science, University of Manchester, Manchester, UK.

<sup>3</sup> Manchester Institute of Biotechnology, University of Manchester, Manchester, UK.

*\*Corresponding author:*

10 Pedro Mendes

Center for Quantitative Medicine, UConn Health, Farmington, Connecticut 06030, USA

Email: pmendes@uchc.edu

## 15 **Abstract**

**Background:** Iron is an essential element of most living organisms but is a dangerous substance when poorly liganded in solution, as it can catalyze the generation of hydroxyl radical and strong evidence supports its involvement, combined with reactive oxygen species, in a wide range of diseases. The hormone hepcidin regulates the export of iron from tissues to the plasma  
20 contributing to iron homeostasis and also restricting its availability to infectious agents. Disruption of iron regulation in mammals leads to disorders such as anemia and hemochromatosis, and contributes to the etiology of several other diseases such as cancer and neurodegenerative diseases.

25 **Results:** Here we develop a dynamic model of mouse iron distribution including regulation by hepcidin and use it to fit existing data from different diets. The model is able to fit data for adequate and low iron diets but has considerable deviations from the data for a rich iron diet. Namely the model predicts more iron in red blood cells and less iron in the liver than what was observed in experiments.

30

**Conclusions:** The implication of these results is that hepcidin alone is not sufficient to regulate iron homeostasis in high iron conditions and that other factors are important. The model was able to simulate anemia when hepcidin was increased but was unable to simulate hemochromatosis when hepcidin was suppressed, supporting the view that in high iron conditions additional  
35 regulatory interactions are important.

## **Keywords**

iron metabolism; iron physiology; hepcidin; anemia; modeling; computer simulation

## Background

40 Iron is an essential element in all multicellular organisms and most microorganisms. It commonly plays a role in oxygen binding and electron transport in proteins in the form of heme or iron-sulfur clusters. Despite its importance, iron can be dangerous when free or poorly liganded in solution as it can catalyze the production of hydroxyl radical from hydrogen peroxide. Indeed there is strong evidence implicating iron together with reactive oxygen species  
45 in a wide range of diseases, including cancer, diabetes, and neurodegenerative diseases [1]. Animals have evolved complex regulatory mechanisms to maintain iron homeostasis and store iron in non-toxic forms. Additionally they also developed mechanisms to sequester iron from circulation during infections [2,3], a defense mechanism to limit proliferation of the infectious agent. Given its simultaneous dependence and toxicity, it is not surprising that iron homeostasis  
50 requires efficient control mechanisms. These mechanisms must be able to damp the effects of deficient or excessive iron intake in normal individuals. Improper regulation of iron homeostasis leads to iron-deficiency anemia, or to hemochromatosis due to iron excess.

The serum iron level depends on intestinal absorption of iron, red blood cell recycling and import and export from various organs, particularly the liver. Iron excretion occurs only through  
55 sloughing of enterocytes, skin and hair shedding, sweating and blood loss. Dietary iron appears mainly in the form of  $\text{Fe}^{3+}$  and it is reduced to  $\text{Fe}^{2+}$  by duodenal cytochrome-b (DCYTB) and other brush border ferrireductases.  $\text{Fe}^{2+}$  is then imported into enterocytes by the divalent metal transporter 1 (DMT1). In enterocytes it is exported to the serum through ferroportin (FPN), or

SLC40A1), the only known iron exporter in mammalian cells [4]. In the serum, iron binds to the  
60 transport protein transferrin (TF) which donates iron to various cell types through the transferrin  
receptors (TFR1, TFR2). Iron can also be exported from hepatocytes and macrophages into the  
serum through ferroportin. Excess iron in the body is stored mainly in the liver, in the form of  
ferritin.

The regulation of systemic iron occurs through the action of the peptide hormone hepcidin  
65 (HAMP) which is synthesized and secreted mainly by the liver [5]. Hepcidin induction increases  
with high serum iron levels [6,7] and decreases with iron deficiency [7,8]. Hepcidin promotes the  
degradation of ferroportin [9], thus higher levels of hepcidin result in lower levels of ferroportin,  
with the consequent accumulation of iron in tissues and lower rate of dietary iron acquisition,  
and a decrease in serum iron level. This effect of iron immobilization is important also in  
70 immune defense to limit microbial pathogen growth and happens due to the induction of  
hepcidin by cytokines. The current understanding of the role of hepcidin in regulating iron  
homeostasis is therefore that a) at high iron loads hepcidin is induced thus decreasing absorption  
of iron (reduction of enteric ferroportin), b) at low iron loads hepcidin is reduced, thus allowing  
transfer of iron from the diet to the serum. Additionally, poor regulation of hepcidin results in  
75 disease: c) chronically low hepcidin or defects in upstream signaling elements (such as HFE,  
TFR2, HJV genes) causes iron overload typical of hemochromatosis, and d) chronically high  
hepcidin (e.g. induced by inflammatory cytokines) causes anemia.

The conceptual model of iron regulation by hepcidin described above is widely illustrated in  
various reviews [3,9–11]. While conceptual models are useful to reason about regulation,

80 ultimately they must be tested quantitatively. This is best achieved by mathematical models and  
computer simulation. Several computational models address particular aspects of iron  
biochemistry, such as iron loading of ferritin [12], erythropoiesis [13–15], or liver hepcidin  
regulation [16] but few consider iron distribution across the body. A good systemic iron model  
85 and genetic perturbations, and be validated with independent experiments. Lao and Kamei [17]  
developed a compartmental model of systemic iron, however it was not calibrated or validated  
with experimental data. Quantification of iron distribution across the body requires data from  
radiolabeled iron uptake in different organs [18]. Lopes *et al.* [19] built three steady-state flux  
distribution models based on a data set of radioactive iron distribution in plasma and 15 other  
90 organs in mice under adequate, iron-deficient, and iron-rich diets [20]; each model describes the  
steady state exchange fluxes of iron between organs in one of the three dietary regimes [19].  
However these models are unable to test the hepcidin regulation model as they do not include  
this hormone. They are also not able to simulate transitions between diet regimes, as each one  
has a distinct set of parameter values (first order rate constants), fitted independently from  
95 different time courses of radioactive iron distribution, one for each dietary regime.

Here we present a dynamic model of systemic iron that includes the action of hepcidin, as  
currently understood, and is calibrated against the Schümann *et al.* dataset [20]. In order to  
increase the molecular detail of the current model relative to those of Lopes *et al.* [19], we  
included known or hypothesized details of iron metabolism and further relevant data collected  
100 from other studies. The strategy taken here was to estimate parameters (calibrate the model)  
against the adequate iron diet dataset and then to investigate if the same model would fit the data

for iron-deficient and iron-rich diets, by allowing only changes in two parameters: dietary iron loading and hepcidin synthesis rate. If the model is able to reproduce the deficient and rich diets in such a way then this shows that the conceptual model of iron regulation by hepcidin is possibly correct (or at least compatible with the data). The model can be further tested/validated by simulating the causes of chronic anemia and hemochromatosis and checking whether the results are consistent with the corresponding phenotypes.

## Methods

### *Modeling framework and computations*

The model is based on ordinary differential equations (ODE), with each pool (species) being modeled by one ODE composed of positive terms that account for the production of the species and negative terms that account for the consumption of the species. Model creation and computations were carried out with the software COPASI version 4.16 (<http://copasi.org>) [21] running on computers with Apple OS X, Microsoft Windows and Linux operating systems. Cell Designer [22] and Inkscape were used to draw SBGN [23] diagrams. Parameter estimation was carried out to fit the data published by Schümann *et al.* [20] by least-squares minimization using various optimization algorithms (see Table 2) in the COPASI parameter estimation framework. The present model is provided as supplementary data to this article in SBML [24] and COPASI formats, in two versions: one including the radioactive tracer species and another only with non-radioactive species. Two models for iron-deficient and iron-rich diets are also provided. These models were deposited in BioModels (<http://www.ebi.ac.uk/biomodels>) [25] and assigned

identifiers MODEL1605030002, MODEL1605030003, MODEL1605030004,  
MODEL1605030005.

### ***Model and data***

125 The intention with this model is to represent the iron homeostasis in the mouse in the presence of  
adequate iron diet. The data from Schümann *et al.* [20] measures the decay of a small single  
injection of radioactive iron ( $^{59}\text{Fe}$ ); the dose is sufficiently small for the perturbation in total iron  
to be negligible, thus the rates that were estimated from these data in [19] correspond to steady  
state fluxes of iron between compartments. While the models of Lopes *et al.* [19] only account  
130 for the radioactive iron, the present model accounts for both radioactive *and* non-radioactive  
iron. This was achieved by duplicating all reactions in the model, one for the radioactive form  
and another for the non-radioactive form, and making sure that both share the same value of rate  
constants (*i.e.* assuming that kinetic isotope effects in the system can be ignored [26]). Where  
necessary the competitive effects between the two iron pools are taken into account.

### 135 ***Model compartments***

While Schümann *et al.* [20] provide data for plasma and 15 different organs, in the present model  
we sought some simplification by only considering the most important organs for iron  
homeostasis. Thus the present model represents: plasma, liver, duodenum, bone marrow, red  
blood cells, spleen and a compartment for the rest of the body that accounts for the aggregate of  
140 iron in stomach, intestine, integument, muscles, heart, fat, lungs, kidneys, brain and testes (*i.e.*  
the  $^{59}\text{Fe}$  content in these compartments in Schümann *et al.* [20] were here added into one single  
 $^{59}\text{Fe}$  species). As the main routes of iron excretion from the body are enterocyte sloughing, skin

desquamation, and hair loss, we reflect these facts by iron export from the duodenum and rest of body to an additional compartment “outside”, which is only important for parameter estimation.

145 Fig. 1 represents the model compartments and the movement of iron between them.

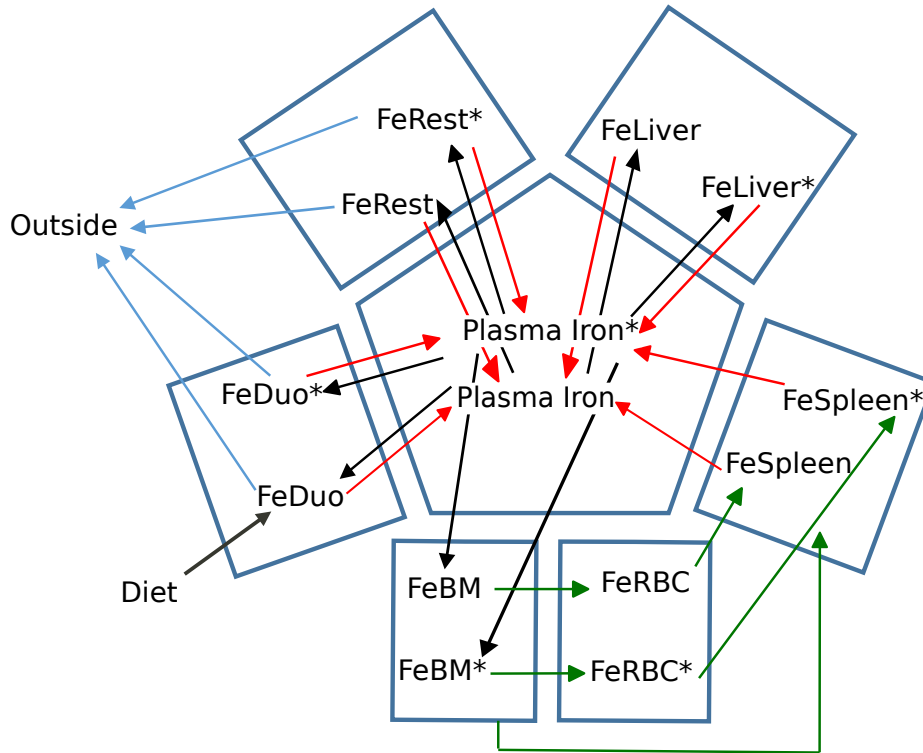

**Figure 1.** Movement of iron between compartments in the model. Arrows indicate the flow of iron. The symbol ‘\*’ marks the radioactive species. Black arrows represent transfer of iron from transferrin to tissues, blue arrows represent transfer of iron from tissues to plasma through ferroportin, green arrows represent erythroid cell dynamics, and grey arrows represent loss of iron.  
150

Since we desired to calibrate the model with absolute concentrations, it was required to estimate volumes for each of these organs considered. We converted the masses of organs provided in  
155 [20] to volumes using densities of equivalent human organs, as published by the International Commission on Radiological Protection [27]. Ideally this conversion should have used mouse



organ densities, but these could not be found in the literature (this error is expected to be small).

The volumes considered are listed in Table 1.

**Table 1** – Mass, density and volume of model compartments.

| <b>Compartment</b>        | <b>Mass (g)</b> <sup>1</sup> | <b>Density (g.cm<sup>-3</sup>)</b> <sup>2</sup> | <b>Volume (l)</b>   |
|---------------------------|------------------------------|-------------------------------------------------|---------------------|
| Bone Marrow               | 0.21                         | 0.98                                            | $2.1 \cdot 10^{-4}$ |
| Duodenum                  | 0.04                         | 1.04                                            | $3.9 \cdot 10^{-5}$ |
| Liver                     | 1.22                         | 1.05                                            | $1.2 \cdot 10^{-3}$ |
| Plasma                    | 1.36                         | 1.03                                            | $1.3 \cdot 10^{-3}$ |
| RBC                       | 0.71                         | 0.90                                            | $7.9 \cdot 10^{-4}$ |
| Rest of body <sup>3</sup> |                              |                                                 | $2.0 \cdot 10^{-2}$ |
| Spleen                    | 0.07                         | 1.04                                            | $6.7 \cdot 10^{-5}$ |

160 <sup>1</sup> From Ref. [20].

<sup>2</sup> From Ref. [27].

<sup>3</sup> Volume was calculated as the sum of volumes of all organs considered in [20] (calculated using the respective densities from [27]) minus the volumes of the other rows in this table.

165

### *Chemical species*

With the exception of plasma, each model compartment includes one species representing that organ's total non-radioactive iron content and another one representing its total radioactive iron content. Using the symbol '\*' to denote the radioactive forms, there are FeBM and FeBM\* in the bone marrow, FeDuo and FeDuo\* in the duodenum, FeLiver and FeLiver\* in the liver, FeSpleen and FeSpleen\* in the spleen, FeRBC and FeRBC\* in the red blood cells, FeRest and FeRest\* in the rest of the body, and FeOutside\* that account for the excreted iron.

In the plasma compartment the model represents several additional chemical species: hepcidin, apo-transferrin (Tf), non-transferrin bound iron (NTBI) and its radioactive equivalent (NTBI\*),

175 transferrin with a single non-radioactive bound iron ion ( $\text{Fe1Tf}$ ), and with a single radioactive  
iron bound ion ( $\text{Fe1Tf}^*$ ), transferrin with two non-radioactive bound iron ions ( $\text{Fe2Tf}$ ), with two  
radioactive bound iron ions ( $\text{Fe2Tf}^{**}$ ) and with one radioactive and one non-radioactive bound  
iron ions ( $\text{Fe2Tf}^*$ ). The reactions between these plasma species follow mass action kinetics as  
they represent simple binding and dissociation.

### 180 *Reactions and reaction kinetics*

Fig. S1 depicts the full set of reactions of the model using the SBGN standard [23]. The number  
of reactions makes the diagram somewhat difficult to understand, thus Fig. S2 illustrates the  
model without considering the radioactive species (which were only needed for parameter  
estimation).

185 **Transferrin and NTBI reactions.** Binding of NTBI or NTBI\* to Tf happens through reversible  
mass action reactions. By considering all the explicit mass action reactions between all  
radioactive and non-radioactive species, the mutual competitive effect of NTBI versus NTBI\* is  
captured naturally. Given that the  $K_d$  for iron binding to transferrin is in the order of  $10^{-22}$  M [28]  
we considered these reactions irreversible to keep the model simpler.

190 **Transferrin-mediated iron import to organs.** The model considers that iron import from the  
plasma into the bone marrow, liver, duodenum and rest of body happens only via the transferrin-  
bound iron species, releasing the iron ions into these organs while apo-transferrin (Tf) remains in  
the plasma. These organs may receive one iron ion (from  $\text{Fe1Tf}$  or  $\text{Fe1Tf}^*$ ) or two (from  $\text{Fe2Tf}$ ,  
 $\text{Fe2Tf}^*$  or  $\text{Fe2Tf}^{**}$ ). These iron import reactions are considered as irreversible mass action in the

model. Arguably these processes are saturable given that they are mediated by receptors (TfR1 and TfR2); however since the model does not consider their regulation they were left as first  
195 order reactions, assuming that there is always enough capacity of transferrin receptors for the supply of iron from transferrin

**Ferroportin-mediated iron export.** Iron is exported to the plasma through ferroportin, which is the only known transporter capable of exporting iron from mammalian cells [4]. Ferroportin iron export is represented by saturable kinetics (Equation 1); the rate law includes a term for  
200 competitive inhibition to represent the effect of the radioactive and non-radioactive species competing for the same transporter (obviously a symmetric effect, *i.e.* the  $K_m$  for the substrate is the same as the  $K_i$  for the competitive inhibitor). The rate law also contains a non-competitive inhibition term representing the effect of hepcidin. The kinetic effect of non-competitive inhibition is equivalent to reducing the apparent  $V_{max}$  and this is exactly the mode of action of  
205 hepcidin since it removes ferroportin molecules (the enzyme of this reaction), thus causing a lowering of the apparent  $V_{max}$ . The model includes ferroportin export reactions to the plasma from the duodenum, spleen, liver and rest of body. The rate of the ferroportin-dependent iron export is thus:

$$V_{ferroportinreactions} = \frac{V \cdot Volume \cdot [S]}{(K_m + [S] + [I_c]) \cdot \left(1 + \frac{[Hep]}{K_i}\right)}, \quad (1)$$

210 where  $V$  is the limiting rate ( $V_{max}$ , proportional to the concentration of ferroportin),  $Volume$  is the volume of the compartment where the substrate and competitive inhibitor are located,  $[S]$  is the

substrate concentration (*e.g.* FeSpleen),  $K_m$  is the Michaelian constant of the substrate (also the competitive inhibition constant of the competitive inhibitor),  $[I_c]$  is the competitive inhibitor concentration (*e.g.* FeSpleen\*),  $[Hep]$  is hepcidin concentration and  $K_i$  the hepcidin non-  
215 competitive inhibition constant. The value of the  $K_m$  and  $K_i$  constants is the same for all the ferroportin reactions since these parameters reflect properties of the protein. On the other hand the parameter  $V$  is estimated independently for each of the four organs, since it reflects the ferroportin protein level in each one and therefore is a characteristic of the tissue. Note that the rate of reaction is expressed in extensive units (amount per time) rather than intensive units  
220 (concentration per time), this is because this reaction crosses two compartments of different volume. COPASI forces such reactions to be expressed in extensive units in order to properly take into account the effect of the different volumes (in fact COPASI internally calculates all ODEs in units of amount per time).

**Erythroid cell dynamics.** About 20-25% of the total body iron cycles between the plasma, bone  
225 marrow, RBC and spleen. Iron is acquired by bone marrow cells that eventually mature into RBC. This represents an iron transfer from one compartment to the other which is modeled here as a first order reaction for both radioactive and non-radioactive iron (same value for their rate constants). Similarly red blood cells are eventually destroyed by spleen macrophages that keep their iron. This process is also reflected in the model by an irreversible mass action reaction from  
230 the RBC iron species to spleen iron species (again both radioactive and non-radioactive with same rate constants). Spleen macrophages are also known to destroy some pre-matured erythroid cells [29] so the model includes a direct iron uptake from the bone marrow to the spleen (as in

[19]), also represented by irreversible mass action kinetics. There is no acquisition of iron from plasma by the RBC; all their iron was already acquired in the bone marrow.

235 **Dietary iron import.** The entry of dietary iron into the circulation happens through the duodenum. The entry of iron into the enterocytes of the duodenum is here represented by a constant flux reaction that represents the time average rate of import of dietary iron rather than simulating specific meals as discrete time events; given that the amount of iron absorbed per meal is a small amount compared to the total iron in the system, such discrete events would have  
240 a small effect and in fact are not detectable in the experimental data used here – thus this simplification is not expected to have significant effect in the results. Considering the import of iron as a continuous process allows this model to define a steady state for which there are many useful analysis tools (the same assumption is also included in [19]). In other uses of the model, this reaction can be set to any other desired flux to represent iron-deficient or iron-rich diets. It  
245 could also be switched on and off at discrete time points to simulate individual meals.

**Iron loss from the body.** Because the enterocytes in the duodenum have a short half-life there is a considerable loss of iron through their sloughing, which is therefore represented as an irreversible mass action reaction from this compartment to the “outside” compartment. A similar process happens to skin and hair cells, which eventually are shed from the body and thus reduce  
250 the total iron. Therefore the model also contains an irreversible mass action reaction from the rest of body to the “outside” compartment (both of these reactions are, of course, mirrored by equivalent ones with the radioactive form of iron).

**Hepcidin.** The model considers hepcidin to be synthesized at a constant rate and degraded by a first order reaction. The values of the parameters of these reactions were set to result in a level of  
255 hepcidin in the nM range. The rate of synthesis is then adjusted to fit the data in the deficient and rich iron diets.

**Initial conditions.** The experiments are carried out by injecting a certain small amount of radioactive iron to male young adult mice that have been kept for 35 days in a certain iron diet (adequate, deficient or rich). Thus one expects this perturbation to occur in a quasi steady-state of  
260 iron and transferrin in the body. We assumed a total concentration of transferrin of  $3.87 \times 10^{-5}$  M [30] and initialized this entirely in the apo-transferrin form. Since there is conservation of transferrin in the stoichiometry of this model, this ensures the total Tf to remain at this value. The total iron amount in normal mice is known to be around 2 mg [31], but since there is no conservation of iron mass in this model, we have no direct control over this value – therefore we  
265 set the following constraint on the parameter estimation:  $1.8 \text{ mg} < TotalFe < 2.2 \text{ mg}$  (where *TotalFe* is the total iron amount obtained by summing all variables that reflect iron concentration). This results in a model that fits the data while also having a total amount of body iron within 10% of the expected value.

Because we do not know the amounts of non-radioactive iron nor the partition of transferrin in its  
270 various iron-bound forms in the initial state, these had to be estimated from the data together with the rate constant values. To achieve that, the time course was first set to take a long “lead-in” time (5000 days) before the radioactive iron is injected. Since the parameter estimation starts only when the radioactive iron is injected, at that point the various non-radioactive species are in

a quasi steady-state. Once a satisfactory fit to the radioactive data is obtained we then repeated  
275 the process by setting the initial concentrations of all species to be what they were in the quasi  
steady-state obtained previously, but this time only having a lead in time of 35 days (equivalent  
to the experiment lead in time for each diet).

## Results

### *Parameter estimation for adequate iron diet:*

280 The values of kinetic constants were estimated in order to match the  $^{59}\text{Fe}$  time-course data in the  
iron-adequate diet experiment. As reported above, a constraint was added to keep the total body  
iron at  $2 \pm 0.2$  mg. To reduce parameter unidentifiability, we set the rate of iron import into the  
body ( $v_{Diet}$  parameter, the rate of the transfer of iron from the outside into the duodenum) to the  
value  $0.0042$  mol day $^{-1}$  which is in the range of expected iron turnover in mice [32].

285 Several independent parameter estimates were carried out using different optimization  
algorithms or combinations thereof. A list of all the parameter estimates obtained is included in  
Table 2. The optimization algorithm that was most successful for this problem was the SRES  
algorithm [33], most likely due to the use of a nonlinear constraint [34]. From all the solutions,  
we picked the one that has a transition time [35,36] for the iron in red blood cells close to the  
290 known average lifetime of these cells in mice (40 days [37–39], the chosen parameter set results  
in a transition time of 42.5 days). Parameter set #6 in Table 2 is therefore the one used hereafter,  
and used in the models included in supplementary data (MODEL1605030002 and  
MODEL1605030003 in BioModels).

**Table 2** – Independent parameter estimates and properties of their models. Model #6 was chosen due to its RBC transition time and Tf saturation being closer to known values in mice. Coefficient of variation (CV) is expressed for each of the estimated parameters across all independent estimates.

|                                                    | #1                    | #2                    | #3                    | #4                    | #5                   | #6                   | #7                   | #8                    | #9                | #10               | CV      |
|----------------------------------------------------|-----------------------|-----------------------|-----------------------|-----------------------|----------------------|----------------------|----------------------|-----------------------|-------------------|-------------------|---------|
| <b>Optimization algorithms<sup>1</sup></b>         | SRES                  | SRES HJ               | PS                    | SRES HJ Praxis        | GA SRES              | SRES                 | SRES GA GASR         | SRES                  | GA HJ             | SRES              |         |
| <i>Sum squares</i>                                 | 0.01906               | 0.01906               | 0.01908               | 0.01909               | 0.01918              | 0.01917              | 0.01937              | 0.01943               | 0.01970           | 0.01975           |         |
| <i>kInDuo (d<sup>-1</sup>)</i>                     | 0.236                 | 0.251                 | 0.322                 | 0.131                 | 0.250                | 0.0690               | 0.158                | 0.134                 | 0.0381            | 0.0347            | 61.1 %  |
| <i>kInLiver (d<sup>-1</sup>)</i>                   | 9.40                  | 9.99                  | 12.7                  | 5.35                  | 10.3                 | 2.98                 | 6.83                 | 5.72                  | 1.69              | 1.55              | 58.3 %  |
| <i>kInRBC (d<sup>-1</sup>)</i>                     | 1.09                  | 1.09                  | 1.10                  | 1.09                  | 1.08                 | 1.08                 | 1.04                 | 1.07                  | 1.19              | 1.20              | 4.64 %  |
| <i>kInRest (d<sup>-1</sup>)</i>                    | 18.3                  | 19.4                  | 24.7                  | 10.4                  | 22.0                 | 6.16                 | 13.9                 | 11.3                  | 3.20              | 2.95              | 58.6 %  |
| <i>kInBM (d<sup>-1</sup>)</i>                      | 49.5                  | 52.7                  | 67.1                  | 28.1                  | 58.8                 | 15.8                 | 35.3                 | 29.7                  | 9.07              | 8.26              | 59.1 %  |
| <i>kDuoLoss (d<sup>-1</sup>)</i>                   | 5.00.10 <sup>-4</sup> | 5.45.10 <sup>-4</sup> | 5.05.10 <sup>-4</sup> | 9.29.10 <sup>-4</sup> | 0.00359              | 0.0270               | 0.0313               | 9.38.10 <sup>-4</sup> | 0.00150           | 0.00150           | 173 %   |
| <i>kRestOut (d<sup>-1</sup>)</i>                   | 0.0238                | 0.0239                | 0.0239                | 0.0238                | 0.0234               | 0.0236               | 0.0234               | 0.0236                | 0.0236            | 0.0234            | 0.851 % |
| <i>kBMSpleen (d<sup>-1</sup>)</i>                  | 0.173                 | 0.173                 | 0.183                 | 0.143                 | 0.0453               | 0.0619               | 0.0680               | 0.0900                | 0.0585            | 0.0567            | 53.3 %  |
| <i>VDuoNTBI (mol d<sup>-1</sup>)</i>               | 2.03                  | 11.4                  | 3.56                  | 0.792                 | 0.910                | 0.200                | 0.200                | 0.901                 | 0.0978            | 0.566             | 167 %   |
| <i>VLiverNTBI (mol d<sup>-1</sup>)</i>             | 0.551                 | 3.15                  | 0.982                 | 0.203                 | 0.0946               | 0.0261               | 0.0295               | 0.204                 | 0.00847           | 0.0937            | 181 %   |
| <i>VSpleenNTBI (mol d<sup>-1</sup>)</i>            | 35.5                  | 202                   | 63.9                  | 12.6                  | 4.86                 | 1.342                | 1.49                 | 10.9                  | 0.434             | 3.89              | 185 %   |
| <i>VRestNTBI (mol d<sup>-1</sup>)</i>              | 0.350                 | 2.01                  | 0.634                 | 0.121                 | 0.0212               | 0.0109               | 0.0128               | 0.102                 | 0.00119           | 0.0114            | 191 %   |
| <i>vRBCSpleen (d<sup>-1</sup>)</i>                 | 0.0833                | 0.0831                | 0.0870                | 0.0706                | 0.0132               | 0.0235               | 0.0283               | 0.043                 | 0.0209            | 0.0190            | 64.4 %  |
| <i>Km (M)</i>                                      | 0.239                 | 1.38                  | 0.412                 | 0.100                 | 0.128                | 0.0159               | 0.0145               | 0.119                 | 0.00850           | 0.117             | 164 %   |
| <i>vDiet (M d<sup>-1</sup>)</i>                    | 0.0042                | 0.0042                | 0.0042                | 0.0042                | 0.00318              | 0.00377              | 0.00397              | 0.0042                | 0.0042            | 0.0042            | 8.25 %  |
| <i>kNTBI_Fe1Tf (M<sup>-1</sup>d<sup>-1</sup>)</i>  | 5.10 <sup>7</sup>     | 5.10 <sup>7</sup>     | 5.10 <sup>7</sup>     | 5.10 <sup>7</sup>     | 4.98.10 <sup>6</sup> | 1.08.10 <sup>9</sup> | 5.25.10 <sup>8</sup> | 5.10 <sup>7</sup>     | 5.10 <sup>7</sup> | 5.10 <sup>7</sup> | 176 %   |
| <i>kFe1Tf_Fe2Tf (M<sup>-1</sup>d<sup>-1</sup>)</i> | 5.10 <sup>7</sup>     | 5.10 <sup>7</sup>     | 5.10 <sup>7</sup>     | 5.10 <sup>7</sup>     | 10.1                 | 1.08.10 <sup>9</sup> | 5.25.10 <sup>8</sup> | 5.10 <sup>7</sup>     | 5.10 <sup>7</sup> | 5.10 <sup>7</sup> | 177 %   |
| <i>TF saturation (%)</i>                           | 46.6                  | 43.7                  | 36.0                  | 70.0                  | 7.15                 | 47.0                 | 25.1                 | 43.7                  | 70.0              | 70.0              |         |
| <i>Total Fe (mg)</i>                               | 2.01                  | 2.01                  | 2.00                  | 2.04                  | 2.20                 | 2.20                 | 2.20                 | 2.20                  | 2.20              | 2.20              |         |
| <i>RBC trans. Time (d)</i>                         | 12.0                  | 12.0                  | 11.5                  | 14.2                  | 75.9                 | 42.5                 | 35.3                 | 23.3                  | 47.9              | 52.6              |         |

290 <sup>1</sup> Key to optimization algorithms: SRES – Evolution strategy with Stochastic Ranking, HJ – Hooke & Jeeves, PS – Particle Swarm, GA – Genetic Algorithm, GASR - Genetic Algorithm with stochastic ranking.

295 An important question about this parameter estimation is whether the parameters are identifiable.

From Table 2 we can see that a couple of parameters have similar estimated values across independent runs (small coefficient of variation, CV): the rate constant for iron loss from the rest of body compartment (*kRestOut*), the rate of maturation of erythrocytes (*kInRBC*) – thus we have



high confidence on these values. On the other hand there is likely a considerable degree of  
300 dependence between the other parameters, yet the conclusions of this study are robust to this  
parameter variation, as shown in supplementary Figure S3 depicting simulations by all 10  
models of Table 2.

Figure 2 shows that the model results are in good agreement with the experimental time-courses  
of  $^{59}\text{Fe}$  in the various tissues compartments. The model largely reproduces the observations from  
305 mice: radioactive iron in the plasma drops sharply as it rapidly transported to other  
compartments. The liver and the rest of body compartments show marked increase in  $^{59}\text{Fe}$  level  
followed by a gradual decline as the iron is exported back into the plasma through ferroportin.  
Bone marrow rapidly takes up to 60% of the injected  $^{59}\text{Fe}$  which then declines as it is utilized in  
the RBC production, reaching a level of 60% in a few days. However, if simulating for a longer  
310 time, say 300 days, the model shows a gradual disappearance of  $^{59}\text{Fe}$  as it is excreted from the  
body supporting a similar experimental observation by Stevens *et al.* [40]. In three compartments  
the model does not fit the data perfectly: the simulated spleen  $^{59}\text{Fe}$  has the initial overshoot  
smaller than that displayed by the data; in the rest of the body the simulation overestimates the  
initial amount of  $^{59}\text{Fe}$ ; in the bone marrow the simulation predicts too fast a decay of  $^{59}\text{Fe}$ , which  
315 in the data takes longer. But these deviations are minor and in the case of the spleen the  
simulation is within one standard deviation of the data.

Overall the model is quite capable of reproducing the dynamics of radiolabeled iron in the  
experiment. The parameter values for the rate constants are therefore adopted as the model for  
mice under an adequate iron diet. The model is supplied in its entirety in the file Parmar2016-

320 AdequateTracer.cps and without the tracer species in the file Parmar2016-AdequateNoTracer.cps  
(and corresponding SBML versions of these files).

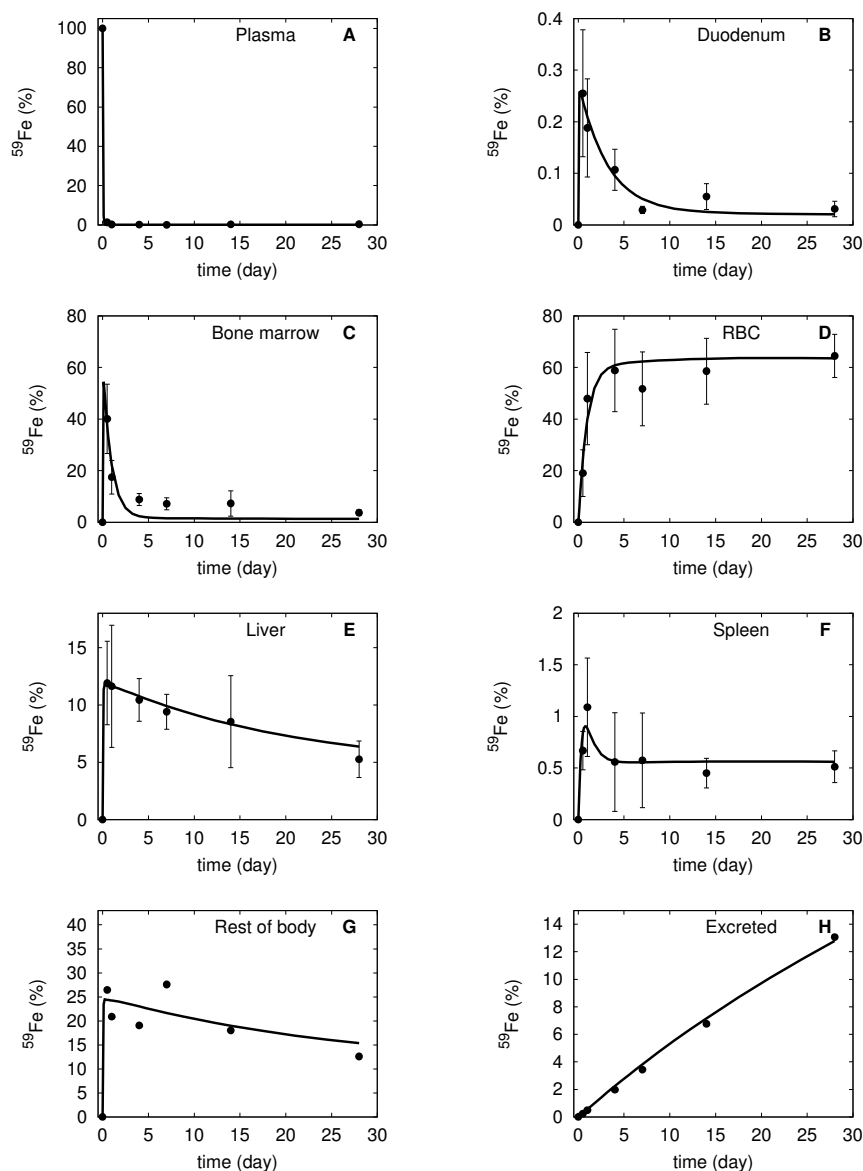

325 **Figure 2.** Simulation of the calibrated model (#6 in Table 2) against the experimental data of  $^{59}\text{Fe}$  injection in mice under adequate iron diet. Continuous line is the model simulation, while filled circles represent the data from [20] (vertical bars represent one standard deviation). The abscissa represents the proportion of total injected  $^{59}\text{Fe}$ , the ordinate is time after injection. **A** plasma, **B** duodenum, **C** bone marrow, **D** red blood cells, **E** liver, **F** spleen, **G** rest of body, and **H** excreted. Note that the standard deviation in panel **A** is smaller than the size of the symbols, while in panels **G** and **H** it was not indicated as it is very large because these data are algebraic sums of various terms.

330

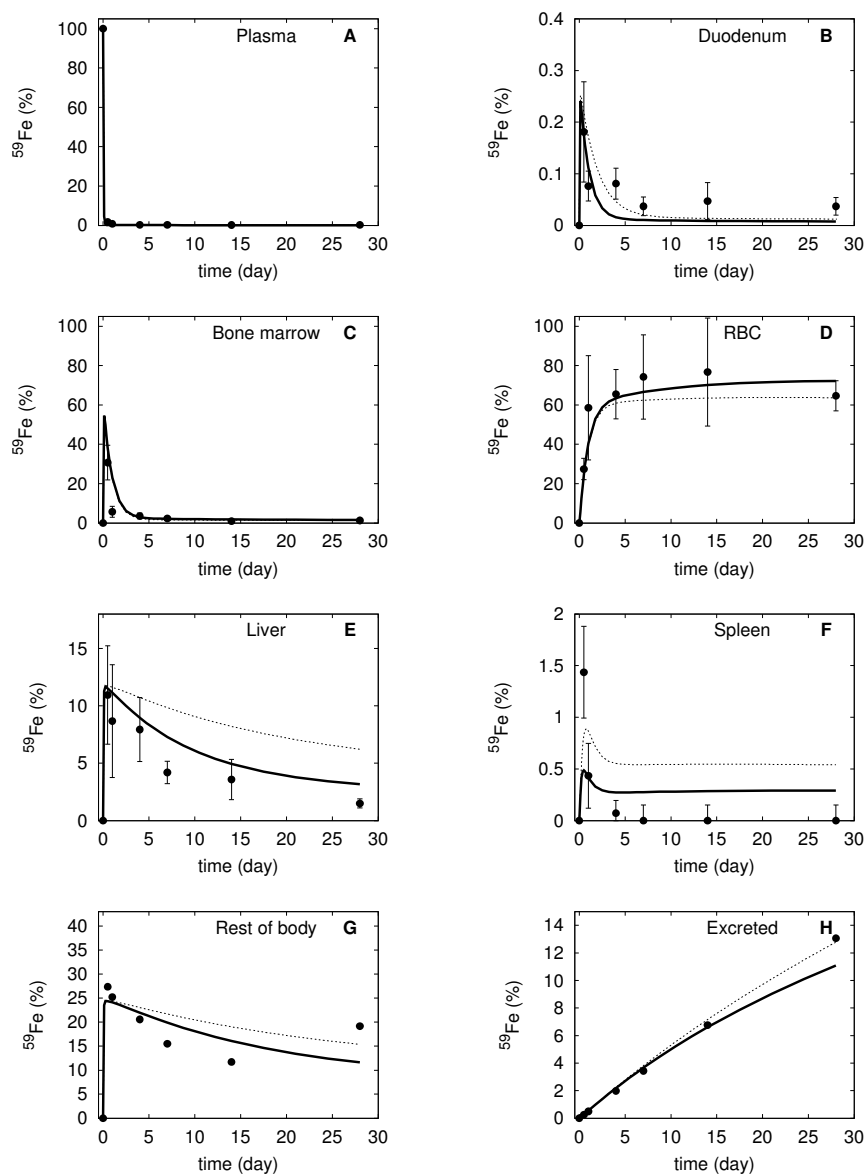

**Figure 3.** Simulation of the calibrated model (#6 in Table 2) against the experimental data of  $^{59}\text{Fe}$  injection in mice under iron-deficient diet. The dotted line represents the simulation when only the diet was adjusted, the bold line is the model simulation when both diet and hepcidin synthesis rate were adjusted. Filled circles represent the data from [20] (vertical bars represent one standard deviation). The abscissa represents the proportion of total injected  $^{59}\text{Fe}$ , the ordinate is time after injection. **A** plasma, **B** duodenum, **C** bone marrow, **D** red blood cells, **E** liver, **F** spleen, **G** rest of body, and **H** excreted. Note that the standard deviation in panel **A** is smaller than the size of the symbols, while in panels **G** and **H** it was not indicated as it is very large because these data are algebraic sums of various terms.

340

### ***Iron-deficient diet***

In accordance with the experimental protocol, the model for iron-adequate diet is simulated with iron-deficient diet (reduced  $vDiet$ ) for 5 weeks before simulating the pulse of  $^{59}\text{Fe}$ . First we show that changing the  $vDiet$  parameter alone does not successfully reproduce the observations from  
345 iron-reduced diet mice. The simulated iron level is too high in the liver, rest of body, and spleen and too low in the RBC, compared to the corresponding experimental values (see Figure 3, dotted lines). Then we also allowed the rate of synthesis of hepcidin to be adjusted in order to better fit the data since this affects its steady state level and therefore the rate of ferroportin-dependent iron export (since hepcidin is a non-competitive inhibitor of these reactions). Once the  
350 hepcidin is also reduced the simulation then better matches the iron levels in the liver and rest of body. Nevertheless, the amount of simulated iron in the spleen is still not a good match to the experimental data.

The deficient diet model, in its version without tracer, was then used to simulate the outcome after 100 days under this diet (Table 3). The result is that the total iron mass in the body would  
355 reduce by 23% (from 2.2 to 1.7 mg) while the transferrin saturation would decrease from 47% to 37%. The iron excretion rate was of 5  $\mu\text{g}/\text{day}$  under this diet, which is in general agreement with data from [31] which reported an excretion rate of 8  $\mu\text{g}/\text{day}$  under a milk diet. It also underlines the fact that since hepcidin can only limit the entry of iron to the plasma, an iron deficient diet will inevitably lead to loss of iron.

360

**Table 3** – Characteristics of the three simulated diets. The table lists the simulated values of various physiological variables after 100 days in the specified diet.

| <b>Variable</b> | <b>Adequate diet</b> | <b>Deficient diet</b> | <b>Rich diet</b> |
|-----------------|----------------------|-----------------------|------------------|
| Tf saturation   | 47 %                 | 37 %                  | 44 %             |
| Total iron      | 2.2 mg               | 1.7 mg                | 2.2 mg           |
| [Hepcidin]      | 23 nM                | 11 nM                 | 31 nM            |
| [NTBI]          | 33 nM                | 22 nM                 | 30 nM            |

### ***Iron-rich diet***

365 Simulation of the iron rich diet experiment follows a similar approach as the deficient diet. We set the different diet regime 5 weeks before the radioactive tracer pulse is applied. First we attempted to fit the data only by changing the rate of iron entry in the duodenum ( $v_{Diet}$  parameter). In this case the fit is also not accurate enough (Figure 4), with simulated RBC iron tracer much higher than actual measurements, while the simulated liver iron tracer is much lower  
370 than measurements.

Then we proceeded to allow the hepcidin synthesis rate to vary as well. In this case the overall fit improved only by a minimal amount. Essentially the simulation is unable to fit the measurements as it accumulates too much iron in the RBC and not enough in the liver. Figure 4 shows that the action of hepcidin, even though in the right direction, is not enough to explain the data. Note that  
375 the rate of synthesis of hepcidin was not limited in the fit, and the value obtained is the one that gives the best overall fit to all the curves.

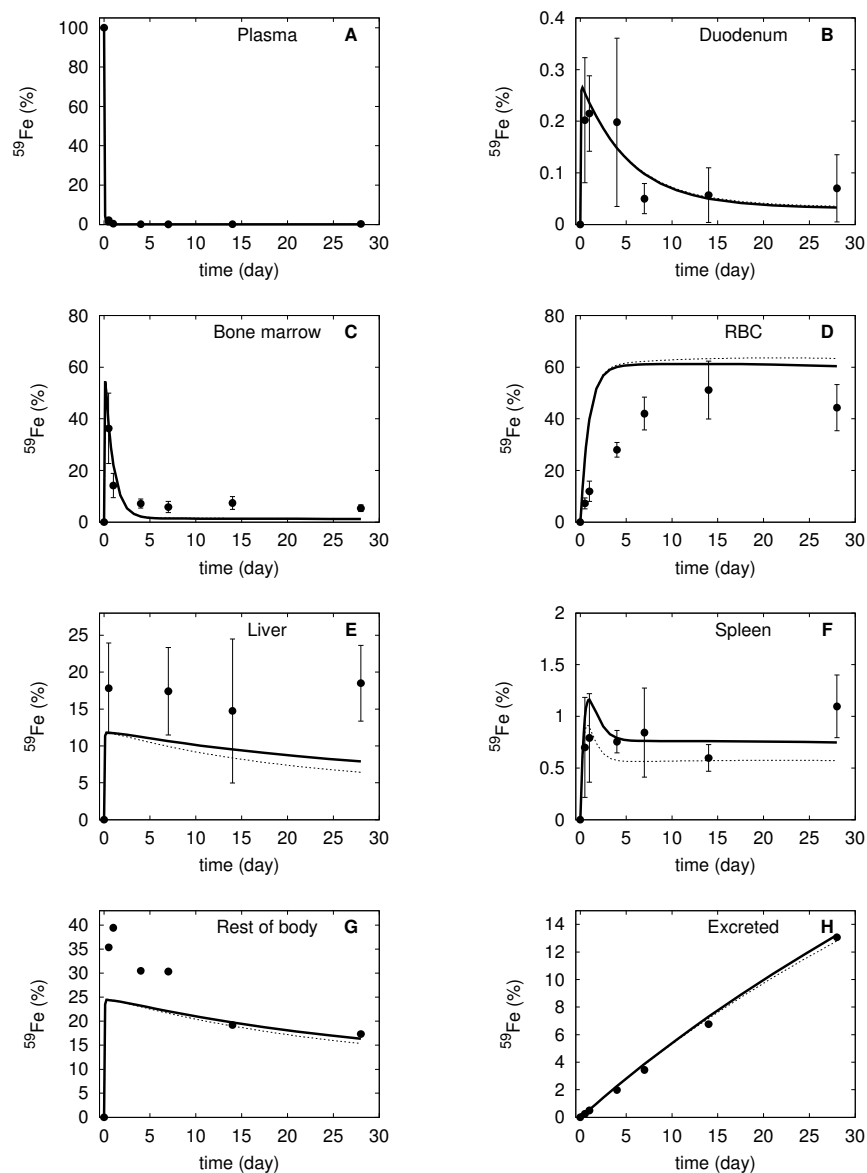

**Figure 4.** Simulation of the calibrated model (#6 in Table 2) against the experimental data of  $^{59}\text{Fe}$  injection in mice under iron-rich diet. The dotted line represents the simulation when only the diet was adjusted, the bold line is the model simulation when both diet and hepcidin synthesis rate were adjusted. Filled circles represent the data from [17] (vertical bars represent one standard deviation). The abscissa represents the proportion of total injected  $^{59}\text{Fe}$ , the ordinate is time after injection. **A** plasma, **B** duodenum, **C** bone marrow, **D** red blood cells, **E** liver, **F** spleen, **G** rest of body, and **H** excreted. Note that the standard deviation in panel **A** is smaller than the size of the symbols, while in panels **G** and **H** it was not indicated as it is very large because these data are algebraic sums of various terms.

When using the last model (with altered  $vDiet$  and hepcidin synthesis rate) to simulate the effect of this diet regime for 100 days, we observe that despite an increase in hepcidin by 35% (from 23  
390 to 31 nM), the total iron, transferrin saturation and NTBI concentration stayed essentially unchanged (Table 3). These results are also not in line with previous observations.

At this point it is important to investigate whether parameter sets other than #6 from Table 2 would better fit the iron-rich diet observations. Thus we further tested the predictions of the other parameter sets from Table 2 for the iron-deficient diet data. However, as shown in Fig. S3  
395 (supplementary data), no parameter sets were able to better match these data than parameter set #6 discussed above. Another possibility could be that using all three data sets (adequate, iron-deficient and iron-rich diets) for parameter estimation would result in a model that would explain all of the data well. We then tried to estimate parameters by fitting all data sets simultaneously (only allowing  $vDiet$  and the synthesis rate of hepcidin to be different for each diet). But even in  
400 this case the best fit model still shows an inability to match the observations for the iron-rich diet, particularly for the RBC and liver iron contents (Figs S4-S6 in supplementary data). This strengthens the conclusion that changes in hepcidin alone are not sufficient to explain the rich diet observations – a conclusion that is independent from the exact parameter estimates as all independent models led to the same result.

405 Finally we decided to take an alternative approach, by fitting the model to the iron-rich diet only and validating it to the adequate and iron-deficient diets. Table S1 (supplementary data) depicts a set of models that fit the iron-rich data, but as shown in Figs S8 and S9 these models cannot explain the other two data sets. A comparison of parameter values between the models calibrated

against the rich-iron diet (Table S1) and those calibrated against the adequate iron diet (Table 2)  
410 was carried out *via* a pair-wise *t*-test (Table S2). The most significantly different parameters  
between the adequate and rich diets were *kRestOut* (the excretion rate through the rest of body),  
*kInRBC* (the intake rate of iron by the RBC) and *kInliver* (the intake rate of iron by the liver).  
This perhaps indicates that additional regulation on these processes is taking place, alongside  
with the hepcidin regulation, under iron rich conditions.

#### 415 ***Simulating the anemia of chronic disease***

Anemia of chronic disease is caused by elevated levels of hepcidin, which immobilize iron in  
tissues and prevents transfer of enterocyte iron to the plasma. This disease can be simulated  
using our adequate iron model by increasing the rate of synthesis of hepcidin. We manipulated  
the hepcidin synthesis rate in order to increase the hepcidin concentration five-fold and observed  
420 how the model evolves during 365 days, still with an adequate iron diet (Figure 5). The  
simulation results qualitatively match with the known physiological indicators of this disease.  
The plasma iron (both transferrin-bound and NTBI), bone marrow iron and RBC iron decreased  
by approximately 3-fold, while the iron in the rest of body decreased about 1.5-fold. On the other  
hand iron accumulated in the duodenum (8-fold), liver (2-fold), and spleen (2-fold). In the spleen  
425 there is a sharp increase in the time frame of 50 days, reaching 10x the initial concentration,  
followed by a slower relaxation. In the liver there is also an overshoot, though that dynamics is  
slower, with the peak at around 180 days. The total body iron decreased by 2-fold.



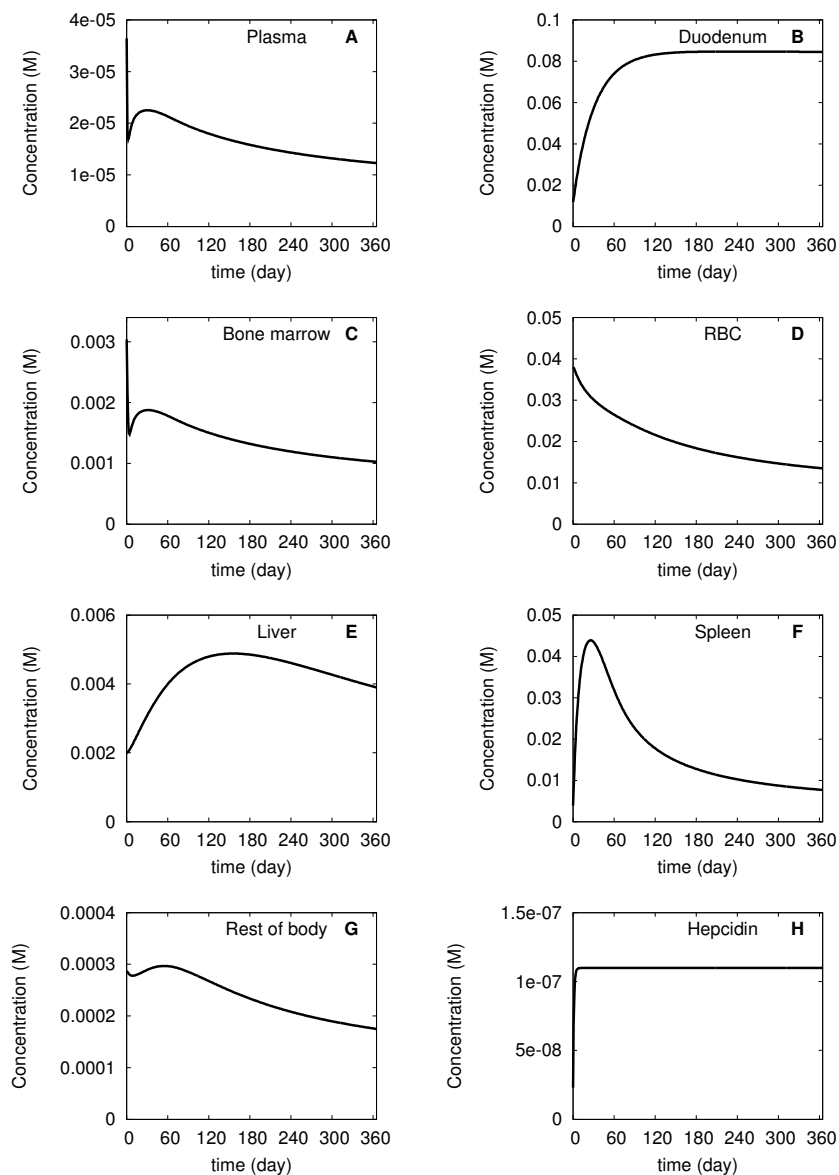

430 **Figure 5.** Simulation of anemia of chronic disease. The model calibrated for the adequate iron diet was used (#6 in Table 2). At time zero the hepcidin level was increased five-fold and maintained at that level for 365 days. The abscissa represents concentration and the ordinate the time. **A** plasma, **B** duodenum, **C** bone marrow, **D** red blood cells, **E** liver, **F** spleen, **G** rest of body, and **H** hepcidin.

## 435 **Discussion**

Models constitute a quantitative framework for reasoning about phenomena. George Box famously said that “all models are wrong, but some are useful” [41]. Indeed the current model is, of course, wrong in many details, but it is useful in revealing the role of hepcidin in iron homeostasis and the extent to which it does *not* explain all observations. The main finding of this  
440 work is that considering hepcidin as the single iron regulator does not allow us to explain the body iron distribution under a broad range of iron diets. When the model is calibrated against the adequate diet data, it overestimates the amount of iron in red blood cells and underestimates the amount of liver iron under the iron-rich diet. If the model would be calibrated to the iron-rich data, it then underestimates the iron in RBC and overestimates the iron in the liver of the adequate  
445 diet. These failings of the model suggest other important factors to be at play.

Before we consider the failings of the model, it is worth pointing out that it is successful in explaining the iron distribution under adequate iron diet, and its prediction for iron-deficient diets is not too far from reality. This allowed us to attempt to simulate anemia of chronic disease, a condition that arises from abnormally elevated hepcidin, usually caused by inflammatory  
450 cytokines. When hepcidin is made to increase five-fold for a period of 365 days, the model predicts a loss of plasma iron accompanied by decreasing levels of iron in bone marrow, red blood cells (causing the anemia) and the rest of the body, while there is an increase in duodenal iron concentration (due to the inhibition of duodenal ferroportin) and transient increases in spleen and liver iron. This is in qualitative agreement with what is observed in this disease.

455 In terms of the failure of the model to match the data of iron-rich diet, we should first consider whether this may be caused by the assumptions adopted in this model. One of these assumptions is the lumping the iron content of several organs into one single compartment (rest of body). Another assumption is that in each organ there is only one pool of iron (two if we consider the radioactive vs. non-radioactive forms) and there is no distinction between heme-bound iron, 460 ferritin-bound iron and the labile iron pool. The model also does not consider the effect of the intracellular regulation that happens through transcriptional and post-transcriptional regulation (iron response elements and iron response proteins). Of all these assumptions, perhaps the one that is likely to have the strongest impact is the lack of several distinct pools of iron. In particular the simulation under-estimation of iron accumulation in the liver may be impacted by 465 lack of ferritin and heme pools of iron; these forms of iron are not readily available to be exported out of the cell and thus could provide a higher capacity to retain iron in the liver, which the present model lacks. However, this cannot be the full explanation, since the elevated hepcidin in the simulation already limits the export of iron from the liver. Additionally, the comparison of parameters between the adequate and rich diet indicated that the intake rate of iron into the liver 470 should increase with the increase of iron in the diet. Thus it is perhaps more important to look at the details of iron import to the liver under heavy iron loads, which may be tied up with the IRE/IRP regulation in hepatocytes. Since the model is not able to appropriately explain the rich diet, specifically the high iron accumulation in the liver, we could not simulate hemochromatosis which is mainly characterized by the liver iron overload.

475

The failure to reproduce the red blood cell content in the iron-rich diet is more likely to be related with regulation of erythropoiesis. What would be required in the simulation to match the data would be a lower rate of iron import into the red blood cells under these conditions as predicted by the parameter comparison analysis between the models fit to the adequate and iron-  
480 rich diets. We note that in the iron-deficient diet the fit of RBC iron is much better, though it slightly under-estimates the iron content, which would go in the direction that the rate of import of iron into bone marrow is inversely proportional to the body iron.

It is only because of the rich data set of Schümann *et al.* [20] that this analysis was possible. In fact previously Lopes *et al.* had already produced a model based on these data [19], however  
485 since that is limited to steady state analysis it only provides three snapshots of the iron fluxes in the three different conditions and does not consider the role of hepcidin explicitly. In order to consider hepcidin it was also necessary to include the non-radioactive iron in the model. Since neither hepcidin nor non-radioactive iron were measured here, the model is less well determined than one would prefer, and required adoption of some assumptions (*e.g.* that total iron is close to  
490 2 mg, and that the lifetime of red blood cells is around 40 days).

Despite the strong effect that hepcidin has on iron absorption by enterocytes and mobilization from liver and macrophages, it is not able, alone, to explain iron distribution in the body. It is clear in this quantitative analysis that other factors must also play a role in this process.

This analysis of the model failures is exactly what makes the present model useful, even if in its  
495 present form it is not very predictive for diets different than the adequate. The model points to

what else is important and thus it is *useful* using Box's criterion. Its failings suggest how to improve it and gain a better understanding of iron regulation. Eventually such a model, to succeed in summarizing all that is known about this physiological process and become truly predictive, will need to include details of intracellular iron regulation – indeed we plan to follow  
500 that course and include some of those details (*e.g.* [16]) in a future multiscale model.

## **Declarations**

### ***Ethics approval***

The animal data used here was previously published by other authors [20].

### ***Availability of data and materials***

505 The data sets supporting the conclusions of this article are included within the article and its additional files.

### ***Competing interests***

The authors declare that they have no competing interests.

### ***Authors' contributions***

510 PM conceived the study. JHP, GD, HS and PM created the model and analyzed the data. JHP and PM wrote the manuscript. All authors read the manuscript and approved its final version.

## ***Acknowledgements***

We thank Karin Finberg and Reinhard Laubenbacher for discussions about this work. GD and

HS worked on this project under the NSF Research Experience for Undergraduates project

515 *Modeling and Simulation in Systems Biology* (DMS-1460967).

## **References**

1. Kell DB. Iron behaving badly: inappropriate iron chelation as a major contributor to the aetiology of vascular and other progressive inflammatory and degenerative diseases. *BMC Med Genomics*. 2009;2:2.
2. Barber MF, Elde NC. Buried Treasure: Evolutionary Perspectives on Microbial Iron Piracy. *Trends Genet*. 2015;31:627–36.
3. Ganz T, Nemeth E. Iron homeostasis in host defence and inflammation. *Nat Rev Immunol*. 2015;15:500–10.
4. Ganz T. Cellular iron: ferroportin is the only way out. *Cell Metab*. 2005;1:155–7.
5. Krause A, Neitz S, Mägert H-J, Schulz A, Forssmann W-G, Schulz-Knappe P, et al. LEAP-1, a novel highly disulfide-bonded human peptide, exhibits antimicrobial activity. *FEBS Lett*. 2000;480:147–50.
6. Pigeon C, Ilyin G, Courselaud B, Leroyer P, Turlin B, Brissot P, et al. A New Mouse Liver-specific Gene, Encoding a Protein Homologous to Human Antimicrobial Peptide Hepcidin, Is Overexpressed during Iron Overload. *J. Biol. Chem*. 2001;276:7811–9.
7. Corradini E, Meynard D, Wu Q, Chen S, Ventura P, Pietrangelo A, et al. Serum and liver iron differently regulate the bone morphogenetic protein 6 (BMP6)-SMAD signaling pathway in mice. *Hepatology*. 2011;54:273–84.
8. Corradini E, Garuti C, Montosi G, Ventura P, Andriopoulos B, Lin HY, et al. Bone Morphogenetic Protein Signaling Is Impaired in an Hfe Knockout Mouse Model of Hemochromatosis. *Gastroenterology*. 2009;137:1489–97.
9. Ganz T. Hepcidin and iron regulation, 10 years later. *Blood*. 2011;117:4425–33.
10. Ganz T, Nemeth E. Hepcidin and iron homeostasis. *Biochim. Biophys. Acta BBA - Mol. Cell Res*. 2012;1823:1434–43.

11. Tussing-Humphreys L, Pustacioglu C, Nemeth E, Braunschweig C. Rethinking Iron Regulation and Assessment in Iron Deficiency, Anemia of Chronic Disease, and Obesity: Introducing Hepcidin. *J. Acad. Nutr. Diet.* 2012;112:391–400.
12. Salgado JC, Olivera-Nappa A, Gerdtzen ZP, Tapia V, Theil EC, Conca C, et al. Mathematical modeling of the dynamic storage of iron in ferritin. *BMC Syst. Biol.* 2010;4:147.
13. Franzone PC, Paganuzzi A, Stefanelli M. A mathematical model of iron metabolism. *J Math Biol.* 1982;15:173–201.
14. Fuertinger DH, Kappel F, Thijssen S, Levin NW, Kotanko P. A model of erythropoiesis in adults with sufficient iron availability. *J Math Biol.* 2013;66:1209–40.
15. Saleh MI, Nalbant D, Widness JA, Veng-Pedersen P. Population pharmacodynamic analysis of erythropoiesis in preterm infants for determining the anemia treatment potential of erythropoietin. *Am J Physiol Regul Integr Comp Physiol.* 2013;304:R772-81.
16. Mitchell S, Mendes P. A computational model of liver iron metabolism. *PLoS Comput Biol.* 2013;9:e1003299.
17. Lao BJ, Kamei DT. A compartmental model of iron regulation in the mouse. *J Theor Biol.* 2006;243:542–54.
18. Geisser P, Burckhardt S. The Pharmacokinetics and Pharmacodynamics of Iron Preparations. *Pharmaceutics.* 2011;3:12–33.
19. Lopes TJ, Luganskaja T, Vujic Spasic M, Hentze MW, Muckenthaler MU, Schumann K, et al. Systems analysis of iron metabolism: the network of iron pools and fluxes. *BMC Syst Biol.* 2010;4:112.
20. Schumann K, Szegner B, Kohler B, Pfaffl MW, Etle T. A method to assess <sup>59</sup>Fe in residual tissue blood content in mice and its use to correct <sup>59</sup>Fe-distribution kinetics accordingly. *Toxicology.* 2007;241:19–32.
21. Hoops S, Sahle S, Gauges R, Lee C, Pahle J, Simus N, et al. COPASI--a COMplex PATHway SIMulator. *Bioinformatics.* 2006;22:3067–74.
22. Matsuoka Y, Funahashi A, Ghosh S, Kitano H. Modeling and Simulation Using CellDesigner. In: Miyamoto-Sato E, Ohashi H, Sasaki H, Nishikawa J, Yanagawa H, editors. *Transcr. Factor Regul. Netw.* [Internet]. New York, NY: Springer New York; 2014 [cited 2016 Jan 25]. p. 121–45. Available from: [http://link.springer.com/10.1007/978-1-4939-0805-9\\_11](http://link.springer.com/10.1007/978-1-4939-0805-9_11)
23. Le Novère N, Hucka M, Mi H, Moodie S, Schreiber F, Sorokin A, et al. The Systems Biology Graphical Notation. *Nat. Biotechnol.* 2009;27:735–41.

24. Hucka M, Finney A, Sauro HM, Bolouri H, Doyle JC, Kitano H, et al. The systems biology markup language (SBML): a medium for representation and exchange of biochemical network models. *Bioinformatics*. 2003;19:524–31.
25. Chelliah V, Juty N, Ajmera I, Ali R, Dumousseau M, Glont M, et al. BioModels: ten-year anniversary. *Nucleic Acids Res*. 2015;43:D542-548.
26. Millard P, Portais J-C, Mendes P. Impact of kinetic isotope effects in isotopic studies of metabolic systems. *BMC Syst. Biol*. 2015 [cited 2016 Jan 26];9. Available from: <http://www.biomedcentral.com/1752-0509/9/64>
27. International Commission on Radiological Protection. Adult reference computational phantoms. *Ann. ICRP*. 2009;39:48–51.
28. Aisen P, Listowsky I. Iron transport and storage proteins. *Annu. Rev. Biochem*. 1980;49:357–93.
29. Ricketts C, Jacobs A, Cavill I. Ferrokinetics and Erythropoiesis in Man: The Measurement of Effective Erythropoiesis, Ineffective Erythropoiesis and Red Cell Lifespan using <sup>59</sup>Fe. *Br. J. Haematol*. 1975;31:65–75.
30. Zhang P, Sawicki V, Lewis A, Hanson L, Monks J, Neville MC. The effect of serum iron concentration on iron secretion into mouse milk. *J. Physiol*. 2000;522:479–91.
31. Chappelle E, Gabrio BW, Stevens J AR, Finch CA. Regulation of body iron content through excretion in the mouse. *Am J Physiol*. 1955;182:390–2.
32. Simpson RJ. Dietary iron levels and hypoxia independently affect iron absorption in mice. *J. Nutr*. 1996;126:1858–64.
33. Runarsson TP, Yao, Xin. Stochastic ranking for constrained evolutionary optimization. *IEEE Trans. Evol. Comput*. 2000;4:284–94.
34. Moles CG. Parameter Estimation in Biochemical Pathways: A Comparison of Global Optimization Methods. *Genome Res*. 2003;13:2467–74.
35. Easterby JS. A generalized theory of the transition time for sequential enzyme reactions. *Biochem. J*. 1981;199:155–61.
36. Lloréns M, Nuño JC, Rodríguez Y, Meléndez-Hevia E, Montero F. Generalization of the theory of transition times in metabolic pathways: a geometrical approach. *Biophys. J*. 1999;77:23–36.
37. Van Putten LM. The life span of red cells in the rat and the mouse as determined by labeling with DFP32 in vivo. *Blood*. 1958;13:789–94.



38. Wang S, Dale GL, Song P, Viollet B, Zou M -h. AMPK 1 Deletion Shortens Erythrocyte Life Span in Mice: Role of Oxidative Stress. *J. Biol. Chem.* 2010;285:19976–85.
39. Gottlieb Y, Topaz O, Cohen LA, Yakov LD, Haber T, Morgenstern A, et al. Physiologically aged red blood cells undergo erythrophagocytosis *in vivo* but not *in vitro*. *Haematologica.* 2012;97:994–1002.
40. Stevens J AR, White PL, Hegsted DM, Finch CA. Iron excretion in the mouse. *J Biol Chem.* 1953;203:161–5.
41. Box GEP. Robustness in the strategy of scientific model building. *Robustness Stat.* RL Launer GN Wilkinson Eds. Academic Press; 1979.
